# Supplementary material
Source: MDPI journal article supplement (https://www.mdpi.com/2227-7390/8/1/19)
Supplement: s1 [file s1]

---

## ATTITUDINAL SURVEY ABOUT THE TEACHING METHODOLOGY

### In general

What level of agreement do you have with the following sentences?

1. Today I am in a good mood Disagree ☐—☐—☐—☐—☐ Agree
2. Statistics is a useful tool for my degree Disagree ☐—☐—☐—☐—☐ Agree

### About the course.

What level of agreement do you have with the following sentences?

3. The course is well targeted to my degree Disagree ☐—☐—☐—☐—☐ Agree
4. I find the course interesting Disagree ☐—☐—☐—☐—☐ Agree
5. Assess the difficulty of the course Very easy ☐—☐—☐—☐—☐ Very difficult
6. Assess the time spent on studying the course (besides the class attendance)
- ☐ Nothing, I only attend the classes.
  - ☐ Less than 1 hour per week.
  - ☐ Between 2 and 3 hours per week.
  - ☐ More than 3 hours per week.
7. I have prepared the out of class material every week: Disagree ☐—☐—☐—☐—☐ Agree

### About the teaching methodology.

8. When it comes to learning Statistics, the most useful methodology is:
- ☐ The traditional lecture.
  - ☐ Active methodologies.
  - ☐ Both are equally useful to learn Statistics.
  - ☐ None is useful to learn Statistics.
9. The teaching methodology used in the teaching group has contributed to my learning.  
Disagree ☐—☐—☐—☐—☐ Agree
10. The teaching methodology used in the work group has contributed to my learning.  
Disagree ☐—☐—☐—☐—☐ Agree
11. I would have learned more with another methodology. Disagree ☐—☐—☐—☐—☐ Agree  
If so, Which one? \_\_\_\_\_
12. I would have learned more with a traditional lecture in the teaching group.  
Disagree ☐—☐—☐—☐—☐ Agree
13. I would have learned more with a traditional lecture in the work group.  
Disagree ☐—☐—☐—☐—☐ Agree
14. Among the activities carried out along the semester, the most helpful is:
- ☐ Teaching group classes.
  - ☐ Working group classes.
  - ☐ Working group in computer room.
15. I find the methodology in the teaching group:
- ☐ Very useful.
  - ☐ Useful.
  - ☐ Useless.
  - ☐ A waste of time.
  - ☐ Other comments: \_\_\_\_\_

---

**16. I find the methodology in the working group (textbook-type problems):**

- ☐ Very useful.
- ☐ Useful.
- ☐ Useless.
- ☐ A waste of time.
- ☐ Other comments: \_\_\_\_\_

**17. I find the methodology in the computer lab:**

- ☐ Very useful.
- ☐ Useful.
- ☐ Useless.
- ☐ A waste of time.
- ☐ Other comments: \_\_\_\_\_

**18. What do you think about the time-distribution per topic?**

- ☐ Suitable.
- ☐ I would have needed to devote more time in the teaching group to the following topic: \_\_\_\_\_
- ☐ I would have needed to devote more time in the working group to the following topic: \_\_\_\_\_
- ☐ Other comments: \_\_\_\_\_

**19. The following assessment methods have contributed to put more effort into the course:**

- Daily assessment in the teaching group.      Disagree ☐—☐—☐—☐—☐ Agree
- Assessable exercises in the working group.      Disagree ☐—☐—☐—☐—☐ Agree
- Negative mark for students who had not done the homework before the class.  
Disagree ☐—☐—☐—☐—☐ Agree

**20. Write which assessment tools you consider more useful to follow the course.**

---

---

## About your learning results.

**What level of agreement do you have with the following sentences?**

21. I have learned Statistics after attending the course.      Disagree ☐—☐—☐—☐—☐ Agree
22. I have learned how to solve problems related with Statistics.      Disagree ☐—☐—☐—☐—☐ Agree
23. I think that I will pass the course.      Disagree ☐—☐—☐—☐—☐ Agree
24. I think that I will pass the course, not thanks to the teaching methodology.  
Disagree ☐—☐—☐—☐—☐ Agree

**25. Comments:**

---

---
